# Supplementary material for: Effect of flake silver-plated copper particles on the property enhancement of electrically conductive adhesives
Source: Royal Society of Chemistry journal article supplement (doi:10.1039/d3cp00209h), 2023-01-01
Supplement: d3cp00209h1.pdf [file d3cp00209h1.pdf]

## Supporting Information

### Effect of flake silver-plated copper particles on properties enhancement of electronic conductive adhesives

Na Cheng<sup>a</sup>, Zhi Sun<sup>a</sup>, Xiaohui Yu<sup>b\*</sup>, Qianzhen Yu<sup>a</sup>, Jianwei Zhao<sup>a\*</sup>

<sup>a</sup> *College of Material and Textile Engineering, Key Laboratory of Yarn Materials Forming and Composite Processing Technology, Jiaxing University, Jiaxing 314001, Zhejiang, China*

<sup>b</sup> *College of Design, Jiaxing University, Jiaxing 314001, Zhejiang, China*

**a)**

**b)**

**Figure S1.** The macroscopic morphology of (a) the pure silver particles and (b) the pure copper particles.

**Figure S2.** The surface morphology of (a) the pure silver particles and (b) the pure copper particles.
